# Supplementary material for: Structure Revision of Anti-Inflammatory Indole Alkaloids with a 1,2-Benzisoxazole Ring
Source: PubMed Central journal article supplement — ACS Omega. 2023 Apr 6;8(15):13967–70. doi: 10.1021/acsomega.3c00408 (PMC10116614; doi:10.1021/acsomega.3c00408), 2023-04-06
Supplement: ao3c00408_si_001.pdf [file ao3c00408_si_001.pdf]

# Structure Revision of Anti-inflammatory Indole Alkaloids with a 1,2-Benzisoxazole Ring

Ju Ryeong Lee <sup>a,#</sup>, Kyoung Jin Park <sup>b,#</sup>, Song Lim Ham <sup>a</sup>, Jonghwan Kim <sup>a</sup>, Chung Sub Kim  
a,b,c,\*

<sup>a</sup> Department of Biopharmaceutical Convergence, Sungkyunkwan University, Suwon 16419,  
Republic of Korea

<sup>b</sup> School of Pharmacy, Sungkyunkwan University, Suwon 16419, Republic of Korea

<sup>c</sup> Department of Biohealth Regulatory Science, Sungkyunkwan University, Suwon 16419,  
Republic of Korea

<sup>#</sup>These authors contributed equally

## Contents

|                                                                                                                                                                                         |   |
|-----------------------------------------------------------------------------------------------------------------------------------------------------------------------------------------|---|
| <b>Table S1.</b> Gibbs free energies and Boltzmann distribution of conformers of original <b>2S-1</b> . ....                                                                            | 3 |
| <b>Table S2.</b> Gibbs free energies and Boltzmann distribution of conformers of revised <b>2S-1</b> . ....                                                                             | 3 |
| <b>Table S3.</b> Experimental (Exp.) and calculated (Cal.) <sup>1</sup> H NMR chemical shift values of original and revised ( $\pm$ )- <b>1</b> used for DP4+ analysis.....             | 3 |
| <b>Figure S1.</b> Key HMBC correlations of revised ( $\pm$ )- <b>1</b> .....                                                                                                            | 4 |
| <b>Figure S2.</b> Results for DP4+ analysis of <b>1</b> with chemical shifts calculated at mPW1PW91/6-311G(d) level (isomer 1 = original <b>1</b> , isomer 2 = revised <b>1</b> ). .... | 5 |
| <b>Figure S3.</b> Experimental UV spectrum of (+)- <b>1</b> and calculated UV spectra of <b>2R-1</b> . ....                                                                             | 6 |
| <b>Coordinates of the conformers</b> .....                                                                                                                                              | 7 |

**Table S1.** Gibbs free energies and Boltzmann distribution of conformers of original 2S-1.

| Conformers      | B3LYP/6-31G(d) Gibbs free energy (298.15 K) |                       |                            |
|-----------------|---------------------------------------------|-----------------------|----------------------------|
|                 | G (Hartree)                                 | $\Delta G$ (kcal/mol) | Boltzmann distribution (%) |
| original 2S-1_1 | -916.1509323                                | 0                     | 61.8                       |
| original 2S-1_1 | -916.1504762                                | 0.286207083           | 38.2                       |

**Table S2.** Gibbs free energies and Boltzmann distribution of conformers of revised 2S-1.

| Conformers     | B3LYP/6-31G(d) Gibbs free energy (298.15 K) |                       |                            |
|----------------|---------------------------------------------|-----------------------|----------------------------|
|                | G (Hartree)                                 | $\Delta G$ (kcal/mol) | Boltzmann distribution (%) |
| revised 2S-1_1 | -916.2190744                                | 0                     | 36.6                       |
| revised 2S-1_2 | -916.2195235                                | -0.281814517          | 58.9                       |
| revised 2S-1_3 | -916.2170880                                | 1.246484871           | 4.5                        |

**Table S3.** Experimental (Exp.) and calculated (Cal.)  $^1\text{H}$  NMR chemical shift values of original and revised ( $\pm$ )-1 used for DP4+ analysis.

| Proton | Exp.        | Cal.                 |                     |
|--------|-------------|----------------------|---------------------|
|        | ( $\pm$ )-1 | original ( $\pm$ )-1 | revised ( $\pm$ )-1 |
| 4      | 7.80        | 7.60                 | 7.83                |
| 5      | 7.32        | 7.49                 | 7.32                |
| 6      | 7.80        | 7.62                 | 7.84                |
| 7      | 8.44        | 8.61                 | 8.40                |
| 8      | 2.05        | 2.07                 | 2.01                |
| 9      | 0.75        | 0.74                 | 0.78                |
| 4'     | 7.87        | 7.71                 | 7.92                |
| 5'     | 6.88        | 6.90                 | 6.77                |
| 6'     | 7.38        | 7.49                 | 7.46                |
| 7'     | 6.96        | 7.03                 | 6.91                |

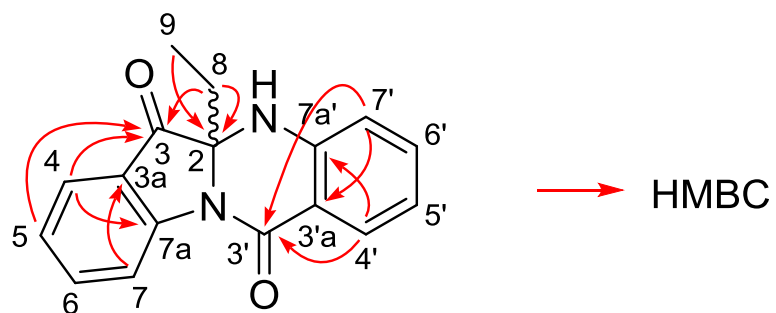

revised structures of ( $\pm$ )-1

**Figure S1.** Key HMBC correlations of revised ( $\pm$ )-1.

| Functional |      | Solvent?     | Basis Set |          |          | Type of Data  |          |
|------------|------|--------------|-----------|----------|----------|---------------|----------|
| mPW1PW91   |      | PCM          | 6-311G(d) |          |          | Scaled Shifts |          |
|            |      | DP4+         | -         | -        | -        | -             | -        |
| Nuclei     | sp2? | Experimental | Isomer 1  | Isomer 2 | Isomer 3 | Isomer 4      | Isomer 5 |
| C          | x    | 198.4        | 198.6     | 198.6    |          |               |          |
| C          | x    | 162.1        | 164.0     | 161.0    |          |               |          |
| C          | x    | 153.1        | 162.5     | 155.7    |          |               |          |
| C          | x    | 149.0        | 159.0     | 148.3    |          |               |          |
| C          | x    | 139.4        | 138.8     | 140.5    |          |               |          |
| C          | x    | 136.0        | 131.2     | 136.7    |          |               |          |
| C          | x    | 129.6        | 126.1     | 130.7    |          |               |          |
| C          | x    | 126.1        | 126.1     | 126.8    |          |               |          |
| C          | x    | 125.5        | 123.9     | 124.8    |          |               |          |
| C          | x    | 124.0        | 120.8     | 122.5    |          |               |          |
| C          | x    | 120.4        | 119.7     | 119.5    |          |               |          |
| C          | x    | 118.4        | 119.3     | 117.5    |          |               |          |
| C          | x    | 117.3        | 114.0     | 117.1    |          |               |          |
| C          | x    | 117.3        | 110.2     | 115.7    |          |               |          |
| C          |      | 80.1         | 74.3      | 80.7     |          |               |          |
| C          |      | 30.2         | 35.7      | 31.1     |          |               |          |
| C          |      | 7.7          | 10.5      | 7.5      |          |               |          |
| H          | x    | 8.44         | 8.61      | 8.40     |          |               |          |
| H          | x    | 7.87         | 7.71      | 7.92     |          |               |          |
| H          | x    | 7.80         | 7.62      | 7.84     |          |               |          |
| H          | x    | 7.80         | 7.60      | 7.83     |          |               |          |
| H          | x    | 7.38         | 7.49      | 7.46     |          |               |          |
| H          | x    | 7.32         | 7.49      | 7.32     |          |               |          |
| H          | x    | 6.96         | 7.03      | 6.91     |          |               |          |
| H          | x    | 6.88         | 6.90      | 6.77     |          |               |          |
| H          |      | 2.05         | 2.07      | 2.01     |          |               |          |
| H          |      | 0.75         | 0.74      | 0.78     |          |               |          |

  

| Functional       | Solvent? | Basis Set |          |          | Type of Data  |          |          |
|------------------|----------|-----------|----------|----------|---------------|----------|----------|
| mPW1PW91         | PCM      | 6-311G(d) |          |          | Scaled Shifts |          |          |
|                  |          | Isomer 1  | Isomer 2 | Isomer 3 | Isomer 4      | Isomer 5 | Isomer 6 |
| sDP4+ (H data)   |          | 0.15%     | 99.85%   | -        | -             | -        | -        |
| sDP4+ (C data)   |          | 0.00%     | 100.00%  | -        | -             | -        | -        |
| sDP4+ (all data) |          | 0.00%     | 100.00%  | -        | -             | -        | -        |
| uDP4+ (H data)   | -        | -         | -        | -        | -             | -        | -        |
| uDP4+ (C data)   | -        | -         | -        | -        | -             | -        | -        |
| uDP4+ (all data) | -        | -         | -        | -        | -             | -        | -        |
| DP4+ (H data)    | -        | -         | -        | -        | -             | -        | -        |
| DP4+ (C data)    | -        | -         | -        | -        | -             | -        | -        |
| DP4+ (all data)  | -        | -         | -        | -        | -             | -        | -        |

**Figure S2.** Results for DP4+ analysis of **1** with chemical shifts calculated at mPW1PW91/6-311G(d) level (isomer 1 = original **1**, isomer 2 = revised **1**).

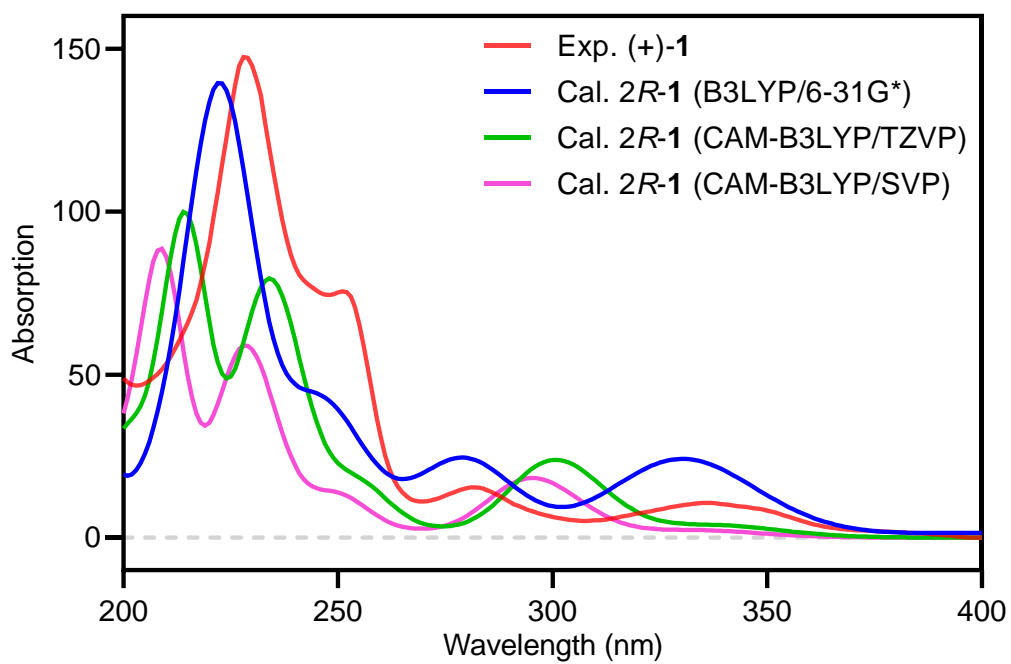

**Figure S3.** Experimental UV spectrum of (+)-**1** and calculated UV spectra of **2R-1**.

## Coordinates of the conformers

original 2S-1\_1

---

| Center<br>Number | Atomic<br>Number | Atomic<br>Type | Coordinates (Angstroms) |           |           |
|------------------|------------------|----------------|-------------------------|-----------|-----------|
|                  |                  |                | X                       | Y         | Z         |
| 1                | 8                | 0              | 0.496885                | -1.634241 | 1.580339  |
| 2                | 6                | 0              | 1.032655                | -0.765062 | 0.912507  |
| 3                | 6                | 0              | 0.412499                | 0.648124  | 0.638670  |
| 4                | 6                | 0              | -0.815106               | 0.540855  | -0.242132 |
| 5                | 7                | 0              | -0.868329               | 1.252640  | -1.339962 |
| 6                | 8                | 0              | -2.118276               | 1.024523  | -1.940122 |
| 7                | 6                | 0              | -2.805991               | 0.155974  | -1.155980 |
| 8                | 6                | 0              | -2.034290               | -0.204874 | -0.044310 |
| 9                | 6                | 0              | -2.549187               | -1.112441 | 0.897933  |
| 10               | 6                | 0              | -3.829357               | -1.606079 | 0.683962  |
| 11               | 6                | 0              | -4.588434               | -1.219426 | -0.441624 |
| 12               | 6                | 0              | -4.091656               | -0.331950 | -1.389893 |
| 13               | 6                | 0              | 0.075984                | 1.310023  | 2.001459  |
| 14               | 6                | 0              | -0.470480               | 2.734620  | 1.891953  |
| 15               | 7                | 0              | 1.494852                | 1.368590  | -0.053416 |
| 16               | 6                | 0              | 2.529839                | 0.489899  | -0.341646 |
| 17               | 6                | 0              | 3.687093                | 0.740093  | -1.092586 |
| 18               | 6                | 0              | 4.627040                | -0.281177 | -1.198391 |
| 19               | 6                | 0              | 4.448928                | -1.532981 | -0.576063 |
| 20               | 6                | 0              | 3.296961                | -1.781371 | 0.159266  |
| 21               | 6                | 0              | 2.338140                | -0.767301 | 0.261310  |
| 22               | 1                | 0              | -1.947625               | -1.432073 | 1.740448  |
| 23               | 1                | 0              | -4.255689               | -2.310864 | 1.391657  |
| 24               | 1                | 0              | -5.585619               | -1.630154 | -0.573694 |
| 25               | 1                | 0              | -4.662152               | -0.032025 | -2.262042 |
| 26               | 1                | 0              | 1.000043                | 1.311297  | 2.591726  |
| 27               | 1                | 0              | -0.633437               | 0.659007  | 2.524348  |
| 28               | 1                | 0              | 0.241845                | 3.390121  | 1.379734  |
| 29               | 1                | 0              | -0.647094               | 3.148497  | 2.890639  |
| 30               | 1                | 0              | -1.418197               | 2.767700  | 1.344008  |
| 31               | 1                | 0              | 1.197165                | 1.996240  | -0.792691 |
| 32               | 1                | 0              | 3.846999                | 1.701357  | -1.572315 |
| 33               | 1                | 0              | 5.529526                | -0.104256 | -1.778142 |
| 34               | 1                | 0              | 5.211826                | -2.298472 | -0.679305 |
| 35               | 1                | 0              | 3.120058                | -2.738788 | 0.640936  |

---

## original 2S-1\_2

---

| Center<br>Number | Atomic<br>Number | Atomic<br>Type | Coordinates (Angstroms) |           |           |
|------------------|------------------|----------------|-------------------------|-----------|-----------|
|                  |                  |                | X                       | Y         | Z         |
| 1                | 8                | 0              | 0.427399                | 1.637890  | 1.457263  |
| 2                | 6                | 0              | 0.951211                | 0.881369  | 0.655539  |
| 3                | 6                | 0              | 0.367000                | 0.552080  | -0.760399 |
| 4                | 6                | 0              | -0.892704               | -0.284961 | -0.636296 |
| 5                | 7                | 0              | -0.969595               | -1.406030 | -1.307954 |
| 6                | 8                | 0              | -2.244885               | -1.952714 | -1.087585 |
| 7                | 6                | 0              | -2.922744               | -1.113271 | -0.264001 |
| 8                | 6                | 0              | -2.120031               | -0.016315 | 0.073015  |
| 9                | 6                | 0              | -2.621426               | 0.978362  | 0.930883  |
| 10               | 6                | 0              | -3.918708               | 0.827699  | 1.402695  |
| 11               | 6                | 0              | -4.708296               | -0.285497 | 1.041996  |
| 12               | 6                | 0              | -4.226237               | -1.283710 | 0.202504  |
| 13               | 6                | 0              | 0.050983                | 1.856424  | -1.538557 |
| 14               | 6                | 0              | 1.253169                | 2.785945  | -1.720458 |
| 15               | 7                | 0              | 1.443886                | -0.223064 | -1.399303 |
| 16               | 6                | 0              | 2.414510                | -0.534943 | -0.457318 |
| 17               | 6                | 0              | 3.528142                | -1.372330 | -0.612280 |
| 18               | 6                | 0              | 4.410341                | -1.485675 | 0.458586  |
| 19               | 6                | 0              | 4.217015                | -0.788507 | 1.667962  |
| 20               | 6                | 0              | 3.107307                | 0.032596  | 1.822325  |
| 21               | 6                | 0              | 2.205170                | 0.143297  | 0.758416  |
| 22               | 1                | 0              | -1.998628               | 1.813710  | 1.228247  |
| 23               | 1                | 0              | -4.335514               | 1.577070  | 2.069063  |
| 24               | 1                | 0              | -5.718294               | -0.367061 | 1.434126  |
| 25               | 1                | 0              | -4.820837               | -2.146158 | -0.078042 |
| 26               | 1                | 0              | -0.748770               | 2.377878  | -1.001056 |
| 27               | 1                | 0              | -0.354518               | 1.566928  | -2.515993 |
| 28               | 1                | 0              | 1.614763                | 3.165589  | -0.758964 |
| 29               | 1                | 0              | 0.970335                | 3.649228  | -2.332434 |
| 30               | 1                | 0              | 2.077098                | 2.268733  | -2.221428 |
| 31               | 1                | 0              | 1.133373                | -0.968985 | -2.013339 |
| 32               | 1                | 0              | 3.699668                | -1.911345 | -1.539533 |
| 33               | 1                | 0              | 5.278681                | -2.131624 | 0.355471  |
| 34               | 1                | 0              | 4.934603                | -0.901660 | 2.474749  |
| 35               | 1                | 0              | 2.919677                | 0.574574  | 2.744843  |

---



## revised 2S-1\_1

---

| Center<br>Number | Atomic<br>Number | Atomic<br>Type | Coordinates (Angstroms) |           |           |
|------------------|------------------|----------------|-------------------------|-----------|-----------|
|                  |                  |                | X                       | Y         | Z         |
| 1                | 8                | 0              | 1.565346                | 2.640505  | -0.850427 |
| 2                | 6                | 0              | 1.441666                | 1.504489  | -0.425986 |
| 3                | 6                | 0              | 0.119489                | 0.935342  | 0.149156  |
| 4                | 6                | 0              | -0.146034               | 1.527641  | 1.564982  |
| 5                | 6                | 0              | -0.481170               | 3.022202  | 1.580036  |
| 6                | 7                | 0              | 0.403996                | -0.507284 | 0.267383  |
| 7                | 6                | 0              | -0.612917               | -1.453481 | 0.365100  |
| 8                | 6                | 0              | -1.963929               | -0.917902 | 0.059572  |
| 9                | 6                | 0              | -3.087028               | -1.729725 | 0.262051  |
| 10               | 6                | 0              | -4.351063               | -1.303844 | -0.127033 |
| 11               | 6                | 0              | -4.491168               | -0.054848 | -0.746841 |
| 12               | 6                | 0              | -3.389773               | 0.766771  | -0.962201 |
| 13               | 6                | 0              | -2.112499               | 0.349533  | -0.554601 |
| 14               | 7                | 0              | -0.975357               | 1.114078  | -0.781813 |
| 15               | 8                | 0              | -0.386027               | -2.630611 | 0.621781  |
| 16               | 6                | 0              | 1.770774                | -0.751403 | 0.084637  |
| 17               | 6                | 0              | 2.478688                | -1.949391 | 0.228824  |
| 18               | 6                | 0              | 3.845897                | -1.920421 | -0.048908 |
| 19               | 6                | 0              | 4.508530                | -0.749316 | -0.457151 |
| 20               | 6                | 0              | 3.795925                | 0.436296  | -0.601217 |
| 21               | 6                | 0              | 2.427431                | 0.427462  | -0.321845 |
| 22               | 1                | 0              | 0.740575                | 1.329907  | 2.180385  |
| 23               | 1                | 0              | -0.969071               | 0.955424  | 2.009047  |
| 24               | 1                | 0              | -0.606796               | 3.364101  | 2.612742  |
| 25               | 1                | 0              | 0.305858                | 3.621193  | 1.113690  |
| 26               | 1                | 0              | -1.421038               | 3.225871  | 1.054304  |
| 27               | 1                | 0              | -2.931554               | -2.702921 | 0.716869  |
| 28               | 1                | 0              | -5.218820               | -1.935064 | 0.036938  |
| 29               | 1                | 0              | -5.473926               | 0.285522  | -1.062674 |
| 30               | 1                | 0              | -3.509414               | 1.734821  | -1.442672 |
| 31               | 1                | 0              | -1.104635               | 2.069078  | -1.093728 |
| 32               | 1                | 0              | 1.972282                | -2.853313 | 0.538062  |
| 33               | 1                | 0              | 4.416182                | -2.839791 | 0.055890  |
| 34               | 1                | 0              | 5.575162                | -0.775633 | -0.658299 |
| 35               | 1                | 0              | 4.273264                | 1.357651  | -0.921836 |

---

## revised 2S-1\_2

---

| Center<br>Number | Atomic<br>Number | Atomic<br>Type | Coordinates (Angstroms) |           |           |
|------------------|------------------|----------------|-------------------------|-----------|-----------|
|                  |                  |                | X                       | Y         | Z         |
| 1                | 8                | 0              | -1.569281               | -2.728329 | -0.778371 |
| 2                | 6                | 0              | -1.413789               | -1.568794 | -0.438050 |
| 3                | 6                | 0              | -0.084119               | -1.031190 | 0.150698  |
| 4                | 6                | 0              | 0.186024                | -1.681527 | 1.532490  |
| 5                | 6                | 0              | -0.879532               | -1.433241 | 2.604648  |
| 6                | 7                | 0              | -0.320376               | 0.419192  | 0.250804  |
| 7                | 6                | 0              | 0.730381                | 1.331622  | 0.341378  |
| 8                | 6                | 0              | 2.063295                | 0.746574  | 0.050835  |
| 9                | 6                | 0              | 3.213653                | 1.519810  | 0.252219  |
| 10               | 6                | 0              | 4.462755                | 1.048027  | -0.131586 |
| 11               | 6                | 0              | 4.560016                | -0.207803 | -0.746102 |
| 12               | 6                | 0              | 3.430909                | -0.990680 | -0.961594 |
| 13               | 6                | 0              | 2.168142                | -0.527471 | -0.558257 |
| 14               | 7                | 0              | 1.005814                | -1.254677 | -0.783304 |
| 15               | 8                | 0              | 0.541951                | 2.519488  | 0.577237  |
| 16               | 6                | 0              | -1.661007               | 0.716756  | -0.032569 |
| 17               | 6                | 0              | -2.318853               | 1.949819  | 0.029924  |
| 18               | 6                | 0              | -3.664261               | 1.975979  | -0.339242 |
| 19               | 6                | 0              | -4.354949               | 0.824540  | -0.756915 |
| 20               | 6                | 0              | -3.692908               | -0.396837 | -0.817398 |
| 21               | 6                | 0              | -2.345895               | -0.442447 | -0.449707 |
| 22               | 1                | 0              | 1.161238                | -1.324672 | 1.883854  |
| 23               | 1                | 0              | 0.281474                | -2.758738 | 1.344568  |
| 24               | 1                | 0              | -0.577404               | -1.904756 | 3.545722  |
| 25               | 1                | 0              | -1.014226               | -0.363775 | 2.796340  |
| 26               | 1                | 0              | -1.850245               | -1.854426 | 2.321855  |
| 27               | 1                | 0              | 3.091498                | 2.500055  | 0.702081  |
| 28               | 1                | 0              | 5.351878                | 1.648918  | 0.031855  |
| 29               | 1                | 0              | 5.530951                | -0.584111 | -1.057712 |
| 30               | 1                | 0              | 3.517496                | -1.964424 | -1.437541 |
| 31               | 1                | 0              | 1.111597                | -2.224656 | -1.058784 |
| 32               | 1                | 0              | -1.791602               | 2.838571  | 0.348332  |
| 33               | 1                | 0              | -4.194815               | 2.923803  | -0.299178 |
| 34               | 1                | 0              | -5.403675               | 0.893935  | -1.029315 |
| 35               | 1                | 0              | -4.192782               | -1.305424 | -1.140147 |

---

## revised 2S-1\_3

---

| Center<br>Number | Atomic<br>Number | Atomic<br>Type | Coordinates (Angstroms) |           |           |
|------------------|------------------|----------------|-------------------------|-----------|-----------|
|                  |                  |                | X                       | Y         | Z         |
| 1                | 8                | 0              | -1.611546               | -2.765429 | -0.777332 |
| 2                | 6                | 0              | -1.488022               | -1.616756 | -0.391806 |
| 3                | 6                | 0              | -0.172603               | -1.060893 | 0.219745  |
| 4                | 6                | 0              | -0.028276               | -1.720750 | 1.619912  |
| 5                | 6                | 0              | 1.180688                | -1.312970 | 2.466040  |
| 6                | 7                | 0              | -0.430394               | 0.388517  | 0.310596  |
| 7                | 6                | 0              | 0.588611                | 1.344895  | 0.302984  |
| 8                | 6                | 0              | 1.924109                | 0.815286  | -0.059158 |
| 9                | 6                | 0              | 3.039798                | 1.659381  | 0.008483  |
| 10               | 6                | 0              | 4.284351                | 1.230883  | -0.435600 |
| 11               | 6                | 0              | 4.409894                | -0.056911 | -0.974748 |
| 12               | 6                | 0              | 3.316123                | -0.911383 | -1.056256 |
| 13               | 6                | 0              | 2.059144                | -0.490291 | -0.588752 |
| 14               | 7                | 0              | 0.938205                | -1.295458 | -0.677030 |
| 15               | 8                | 0              | 0.360979                | 2.530115  | 0.516631  |
| 16               | 6                | 0              | -1.791438               | 0.648588  | 0.078639  |
| 17               | 6                | 0              | -2.484821               | 1.858679  | 0.188370  |
| 18               | 6                | 0              | -3.841765               | 1.851165  | -0.137742 |
| 19               | 6                | 0              | -4.510394               | 0.688445  | -0.558857 |
| 20               | 6                | 0              | -3.813410               | -0.509970 | -0.667498 |
| 21               | 6                | 0              | -2.455214               | -0.521397 | -0.341302 |
| 22               | 1                | 0              | -0.017006               | -2.804123 | 1.441491  |
| 23               | 1                | 0              | -0.951795               | -1.510589 | 2.175733  |
| 24               | 1                | 0              | 1.158878                | -1.858384 | 3.416216  |
| 25               | 1                | 0              | 2.127428                | -1.547252 | 1.970663  |
| 26               | 1                | 0              | 1.174271                | -0.243589 | 2.698604  |
| 27               | 1                | 0              | 2.892604                | 2.658989  | 0.404959  |
| 28               | 1                | 0              | 5.146425                | 1.887786  | -0.376592 |
| 29               | 1                | 0              | 5.376166                | -0.401323 | -1.334227 |
| 30               | 1                | 0              | 3.425173                | -1.908894 | -1.474965 |
| 31               | 1                | 0              | 1.054753                | -2.260486 | -0.960173 |
| 32               | 1                | 0              | -1.975002               | 2.757556  | 0.505779  |
| 33               | 1                | 0              | -4.398740               | 2.781341  | -0.060216 |
| 34               | 1                | 0              | -5.569110               | 0.730693  | -0.795964 |
| 35               | 1                | 0              | -4.294834               | -1.426637 | -0.995379 |

---
